# Supplementary material for: Sulfonatocalix[4]arene-based light-harvesting amphiphilic supramolecular assemblies for sensing sulfites in cells
Source: Royal Society of Chemistry journal article supplement (doi:10.1039/d0tc05243d), 2020-12-23
Supplement: d0tc05243d1.pdf [file d0tc05243d1.pdf]

## Supporting Information

### **Sulfonatocalix[4]arene-Based Light-Harvesting Amphiphilic Supramolecular Assemblies for Sensing Sulfites in Cells**

Zhixue Liu, Xiaohan Sun, Xianyin Dai, Jingjing Li, Peiyu Li, and Yu Liu\*

State Key Laboratory of Elemento-Organic Chemistry, College of Chemistry, Nankai University, Tianjin 300071, P. R. China. E-mail: [yuliu@nankai.edu.cn](mailto:yuliu@nankai.edu.cn)

#### **Table of Contents**

|                                                  |            |
|--------------------------------------------------|------------|
| <b>1. Synthetic route of compounds .....</b>     | <b>S2</b>  |
| <b>2. Spectra data .....</b>                     | <b>S3</b>  |
| <b>3. Characterization of the compounds.....</b> | <b>S8</b>  |
| <b>4. References.....</b>                        | <b>S10</b> |

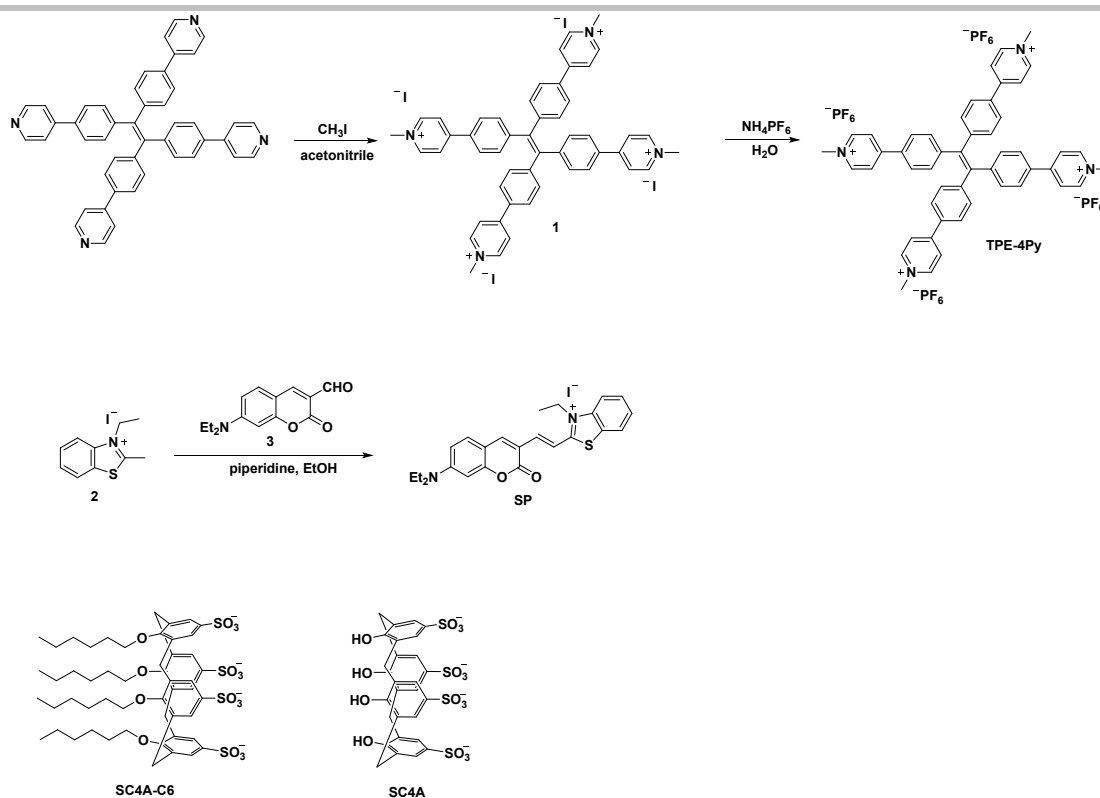

**Scheme S1.** Synthesis of **TPE-4Py** and **SP**, and the structure of **SC4A-C6**, **SC4A**.

### Compound 1

Compound **1**, **2**, **3**, **SC4A** and **SC4A-C6** were synthesized according to the reported references, respectively.<sup>1-4</sup>

### TPE-4Py

Compound **1** (100 mg, 0.08 mmol) was dissolved in  $\text{H}_2\text{O}$  (5 mL) and the solution was stirred at room temperature for 1h. After that,  $\text{NH}_4\text{PF}_6$  saturated solution (20 mL) was added dropwise, and the reaction mixture was stirred overnight. After that, filtered and drip washing with  $\text{H}_2\text{O}$  (100 mL) to achieve **TPE-4Py** (85 mg, 81%) as a yellow solid.

$^1\text{H}$  NMR (400 MHz, DMSO)  $\delta$  8.97 (d,  $J$  = 6.6 Hz, 8H), 8.45 (d,  $J$  = 6.6 Hz, 8H), 8.01 (d,  $J$  = 8.3 Hz, 8H), 7.38 (d,  $J$  = 8.3 Hz, 8H), 4.31 (s, 12H).

HRMS-ESI ( $m/z$ ):  $[\text{M}]^{4+}$  calcd for  $\text{C}_{24}\text{H}_{25}\text{IN}_2\text{O}_2\text{S}$ : 175.0886; found: 175.0889.

### SP

To a solution of compound **3** (200 mg, 0.82 mmol) in absolute ethyl alcohol, compound **2** (299 mg, 1.63 mmol) and piperidine (16.2  $\mu\text{L}$ , 0.16 mmol) were added, and the reaction was refluxed overnight. Cooling to room temperature to obtain a large amount of precipitate, filtered and recrystallized in absolute ethyl alcohol to afford **SP** as a dark green solid (261 mg, 59.9%).

$^1\text{H}$  NMR (400 MHz, DMSO)  $\delta$  8.64 (s, 1H), 8.40 (d,  $J$  = 7.8 Hz, 1H), 8.28 (d,  $J$  = 8.5 Hz, 1H), 8.05 (s, 2H), 7.85 (t,  $J$  = 7.8 Hz, 1H), 7.76 (t,  $J$  = 7.7 Hz, 1H), 7.59 (d,  $J$  = 9.1 Hz, 1H), 6.89 (dd,  $J$  = 9.1, 2.2 Hz, 1H), 6.70 (d,  $J$  = 2.1 Hz, 1H), 4.80 (q,  $J$  = 7.1 Hz, 2H), 3.55 (q,  $J$  = 6.9 Hz, 4H), 1.49 (t,  $J$  = 7.2 Hz, 3H), 1.17 (t,  $J$  = 7.0 Hz, 6H).

HRMS-ESI ( $m/z$ ):  $[\text{M}+\text{H}]^+$  calcd for  $\text{C}_{24}\text{H}_{25}\text{IN}_2\text{O}_2\text{S}$ : 405.1631; found: 405.1635.

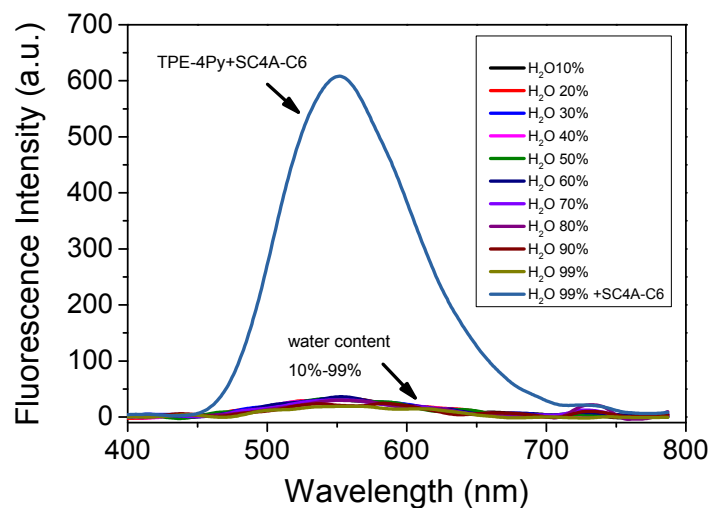

**Figure S1.** Fluorescence spectra of **TPE-4Py** (10  $\mu$ M) in  $H_2O$ /THF mixtures with different  $H_2O$  fractions and in the presence of **SC4A-C6** at the  $H_2O$  content of 99% ( $\lambda_{ex}$  = 365 nm; slit: 2.5/5 nm).

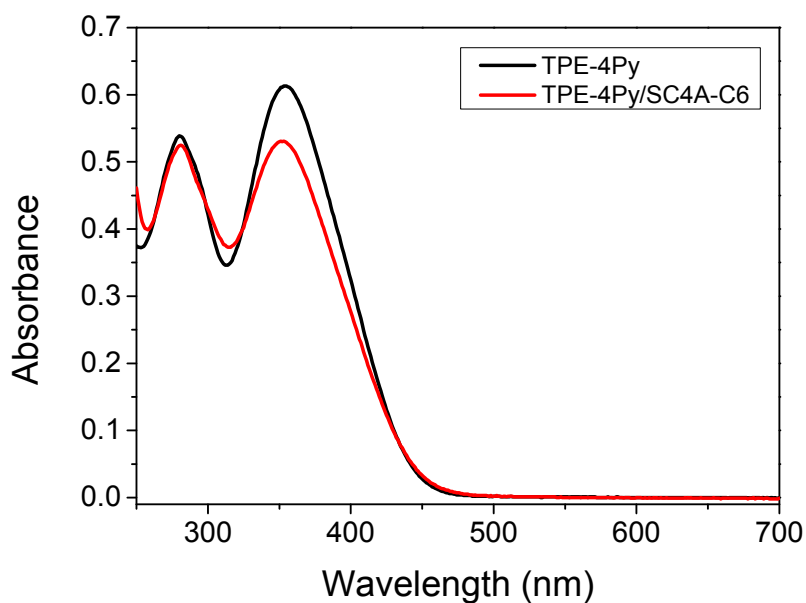

**Figure S2.** UV-vis absorption spectrum of **TPE-4Py** (14  $\mu$ M) and **TPE-4Py/SC4A-C6** ( $[SC4A-C6]$  = 12  $\mu$ M,  $[TPE-4Py]$  = 14  $\mu$ M) in PBS buffer solution.

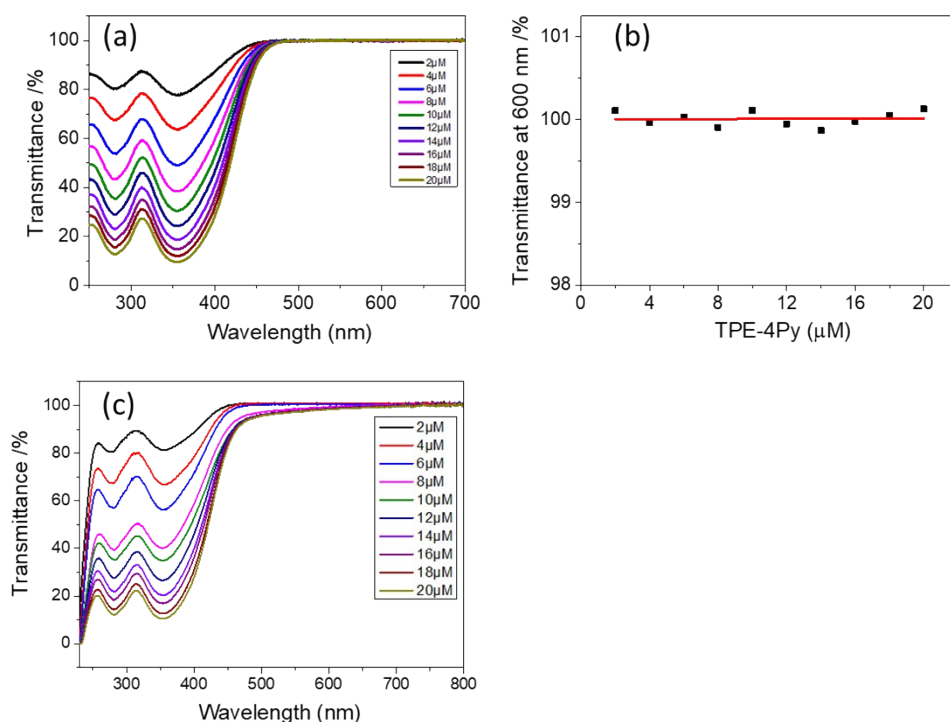

**Figure S3.** (a) Optical transmittance of **TPE-4Py** at different concentrations in PBS buffer solution. (b) Dependence of the optical transmittance at 600 nm at different concentrations of **TPE-4Py**. (c) Optical transmittance of **TPE-4Py** at different concentrations in the presence of **SC4A-C6** (10 μM) in PBS buffer solution.

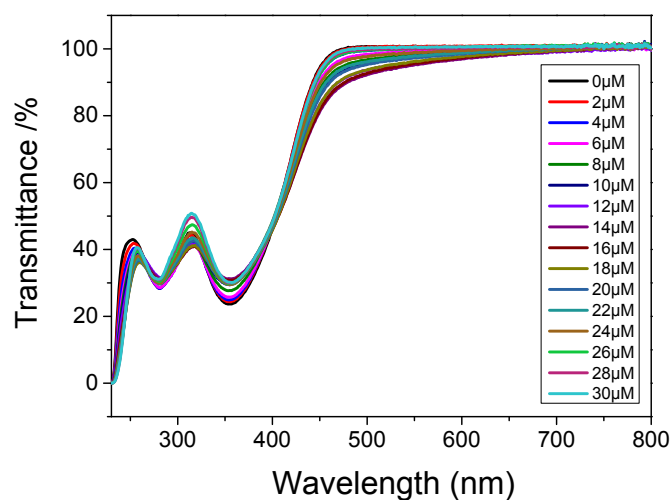

**Figure S4.** Optical transmittance of **SC4A-C6** on different concentrations in the presence of **TPE-4Py** (12 μM).

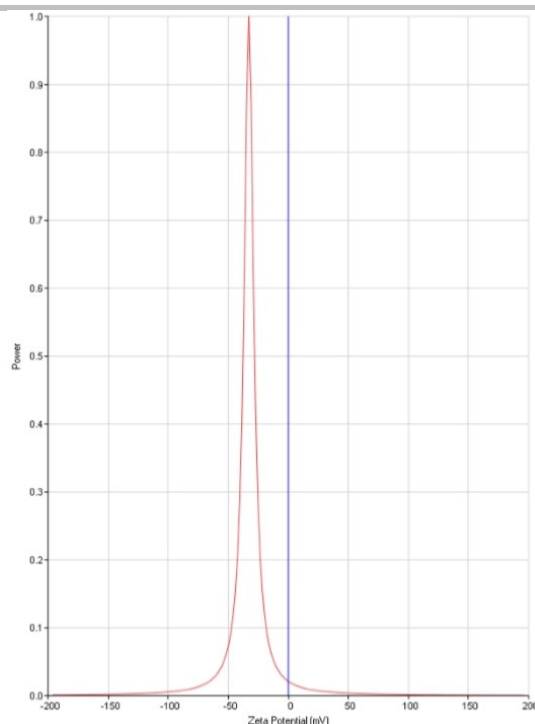

**Figure S5.** Zeta potential of **TPE-4Py/SC4A-C6** ( $[\text{SC4A-C6}] = 12 \mu\text{M}$ ,  $[\text{TPE-4Py}] = 14 \mu\text{M}$ ).

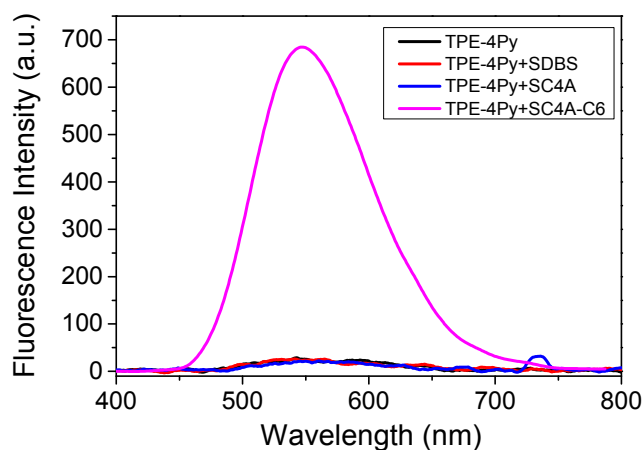

**Figure S6.** Fluorescence spectra of **TPE-4Py** ( $12 \mu\text{M}$ ) in the presence **SC4A** ( $14 \mu\text{M}$ ); **SC4A-C6** ( $14 \mu\text{M}$ ), SDBS [sodium dodecyl benzene sulfonate ( $14 \mu\text{M}$ )] in PBS buffer solution ( $\lambda_{\text{ex}} = 365 \text{ nm}$ ; slit:  $2.5/5 \text{ nm}$ ).

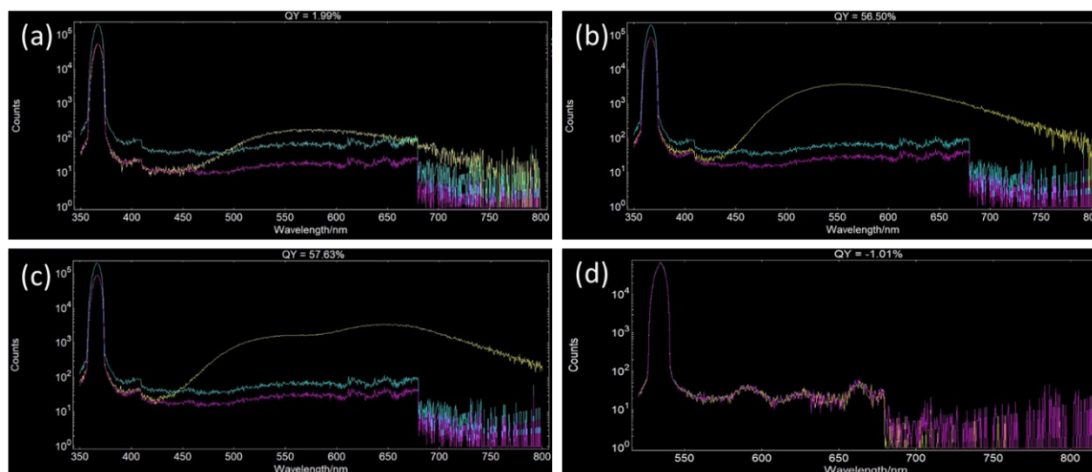

**Figure S7.** Quantum yields of (a) **TPE-4Py**, (b) **TPE-4Py/SC4A-C6**, (c) **TPE-4Py/SC4A-C6/SP** and (d) **SP** in PBS buffer solution (pH 7.4, 10 mM).

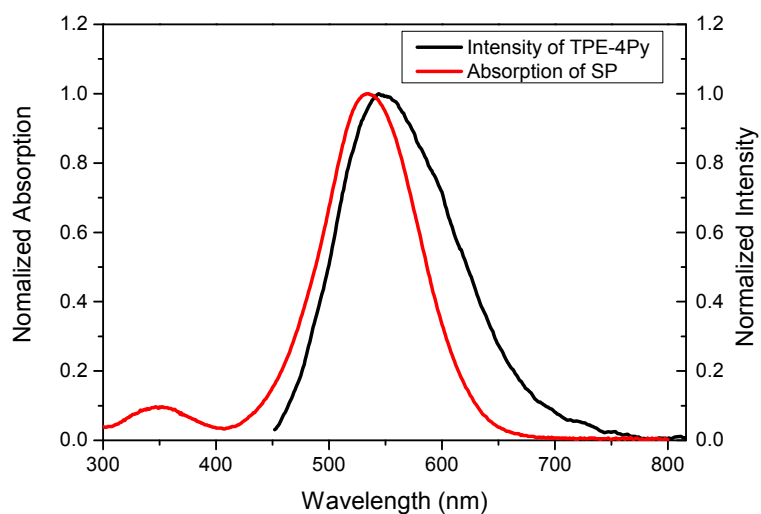

**Figure S8.** Normalized emission spectrum of **TPE-4Py** and absorption spectrum of **SP**.

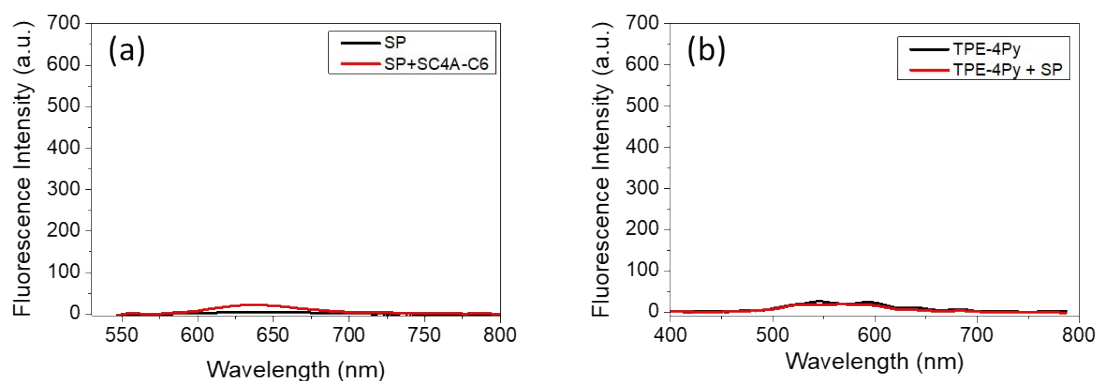

**Figure S9.** Fluorescence spectra of **SC4A-C6/SP** (**[SC4A-C6]** = 12  $\mu$ M, **[SP]** = 216 nM) and **TPE-4Py/SP** (**[TPE-4Py]** = 12  $\mu$ M, **[SP]** = 216 nM) in PBS buffer solution (10 mM, pH 7.4). (a) ( $\lambda_{\text{ex}}$  = 533 nm slit: 2.5/5 nm); (b) ( $\lambda_{\text{ex}}$  = 365 nm; slit: 2.5/5 nm).

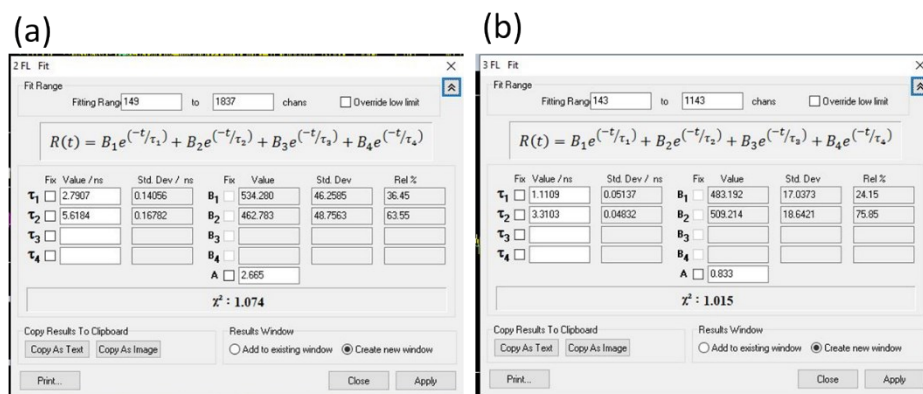

**Figure S10.** Fluorescence decay profiles of **TPE-Py/SC4A-C6** (a), and **TPE-Py/SC4A-C6/SP** (b) in PBS buffer solution (**[TPE-Py]** = 12  $\mu$ M, **[SC4A-C6]** = 14  $\mu$ M, **[SP]** = 216 nM) ( $\lambda_{\text{ex}}$  = 365 nm,  $\lambda_{\text{em}}$  = 350–800 nm).

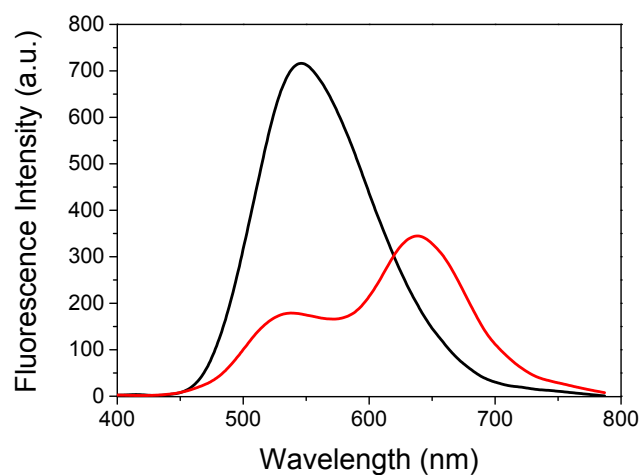

**Figure S11.** Fluorescence spectra of **TPE-4Py/SC4A-C6** (black) and **TPE-4Py/SC4A-C6/SP** (red) in PBS (10 mM, pH 7.4) ([**TPE-4Py**] = 12  $\mu$ M, [**SC4A-C6**] = 14  $\mu$ M, [**SP**] = 216 nM) ( $\lambda_{\text{ex}}$  = 365 nm; slits: 2.5/5 nm).

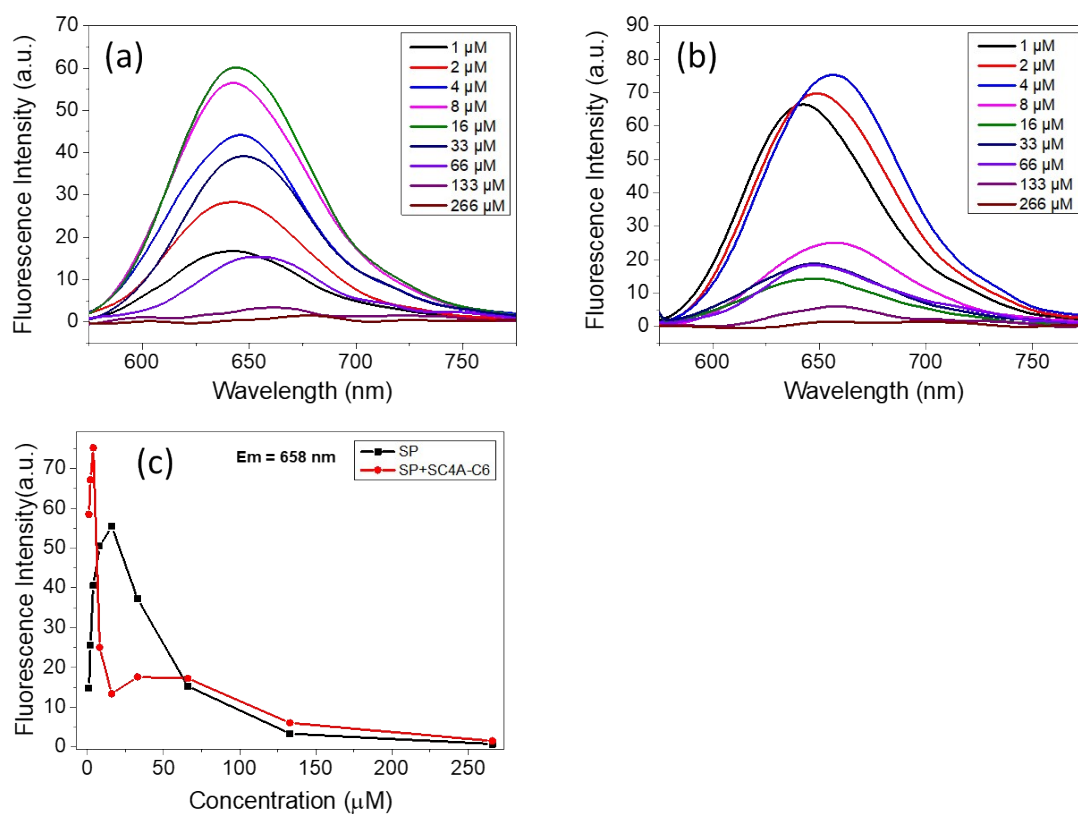

**Figure S12.** Fluorescence spectra of **SP** (a) and **SC4A-C6/SP** (b) at different concentrations in PBS buffer solution. (c) The fluorescence intensity of **SP** and **SC4A-C6/SP** at 658 nm in different concentration. ( $\lambda_{\text{ex}}$  = 533 nm; slit: 2.5/5 nm).

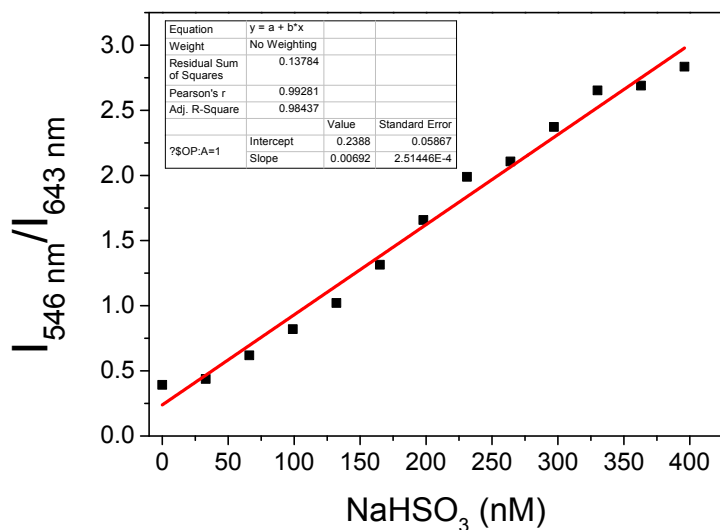

**Figure S13.** Fluorescent intensity ratio ( $I_{546 \text{ nm}}/I_{643 \text{ nm}}$ ) changes of **TPE-4Py/SC4A-C6/SP** as a function of the concentration of  $\text{NaHSO}_3$  in PBS buffer (pH 7.4, 10 mM). Each spectrum was recorded after 8 min ( $\lambda_{\text{ex}} = 365 \text{ nm}$ ; slits: 2.5/5 nm).

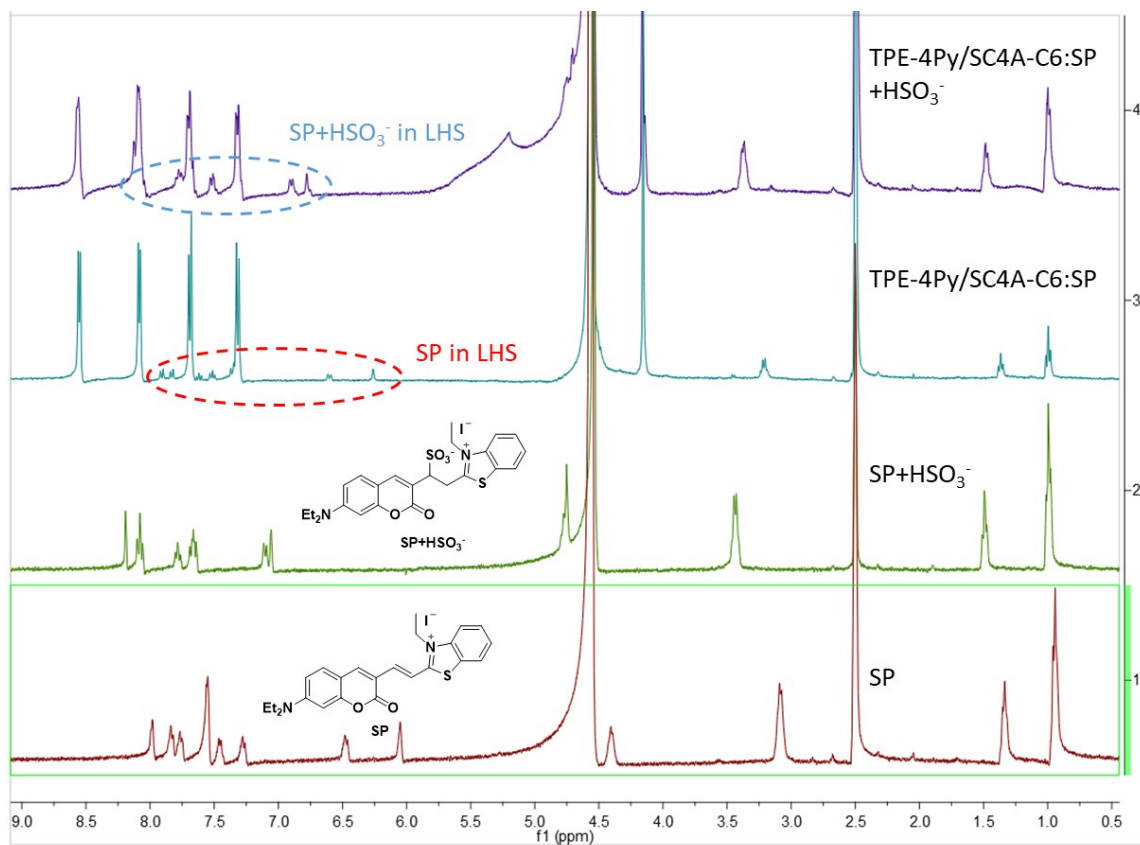

**Figure S14.**  $^1\text{H}$  NMR spectra of **SP** and **TPE-4Py/SC4A-C6/SP** in the presence of  $\text{HSO}_3^-$  ( $\text{DMSO-d}_6/\text{D}_2\text{O}$ ).

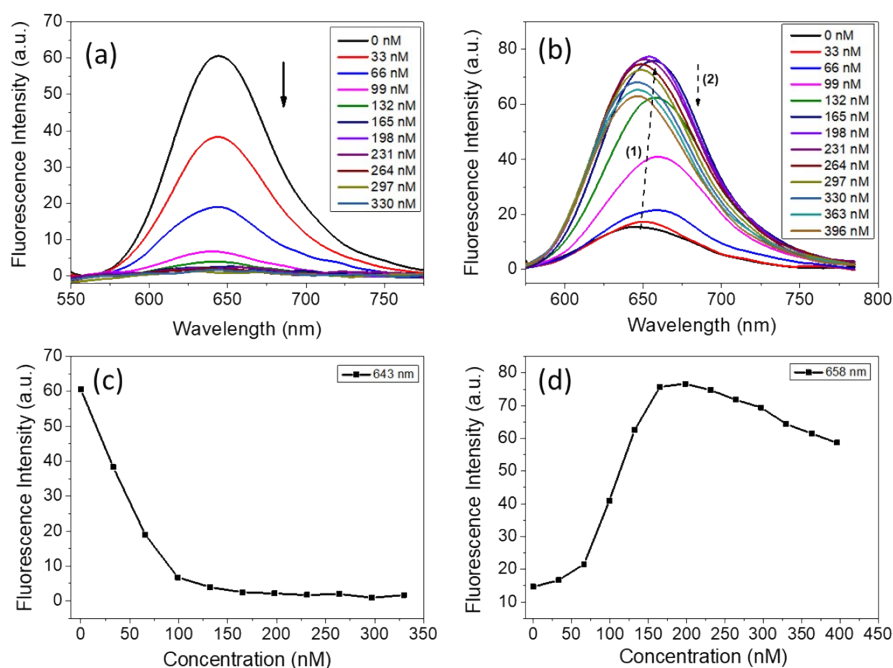

**Figure S15.** (a) Fluorescence spectra of **SP** (14 μM) upon gradual addition of HSO<sub>3</sub><sup>-</sup> in PBS buffer. (b) Fluorescence spectra of **SC4A-C6/SP** ([**SP**] = 14 μM, [**SC4A-C6**] = 12 μM) upon gradual addition of HSO<sub>3</sub><sup>-</sup> in PBS buffer solution. (c) The fluorescence intensity of **SP** at 643 nm upon gradual addition of HSO<sub>3</sub><sup>-</sup> in PBS buffer. (D) The fluorescence intensity of **SC4A-C6/SP** at 658 nm upon gradual addition of HSO<sub>3</sub><sup>-</sup> in PBS buffer solution. ( $\lambda_{\text{ex}}$  = 533 nm; slit: 2.5/5 nm).

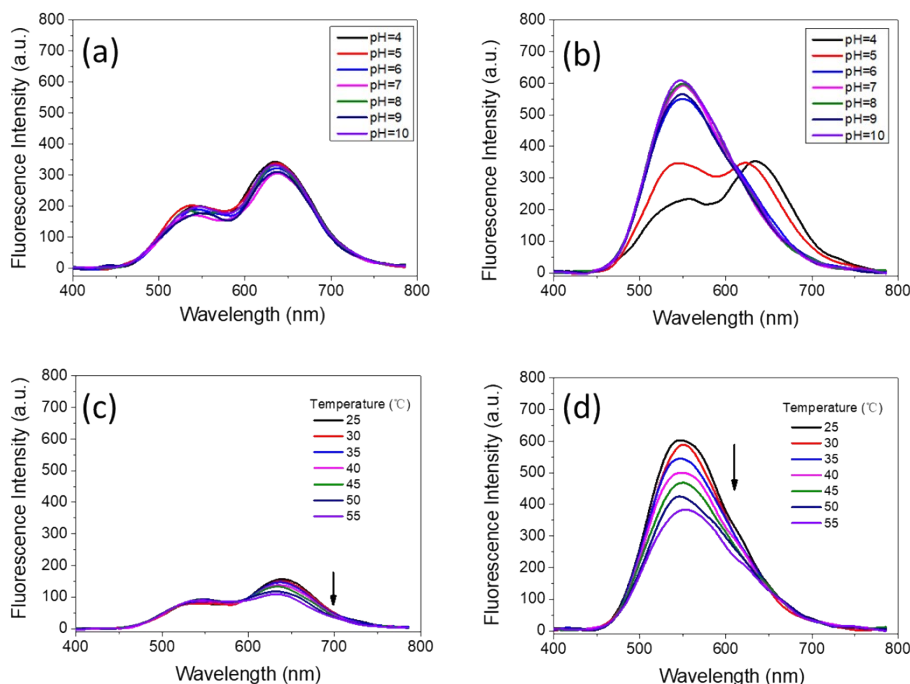

**Figure S16.** (a) Fluorescence spectra of **TPE-4Py/SC4A-C6/SP** at different pH values. (b) Fluorescence spectra of **TPE-4Py/SC4A-C6/SP** toward HSO<sub>3</sub><sup>-</sup> (0.4 mM) at different pH values. (c) Fluorescence spectra of **TPE-4Py/SC4A-C6/SP** at different temperatures. (b) Fluorescence spectra of **TPE-4Py/SC4A-C6/SP** toward HSO<sub>3</sub><sup>-</sup> (0.4 mM) at different temperatures. ([**TPE-4Py**] = 12 μM, [**SC4A-C6**] = 14 μM, [**SP**] = 216 nM) ( $\lambda_{\text{ex}}$  = 365 nm; slit: 2.5/5 nm).

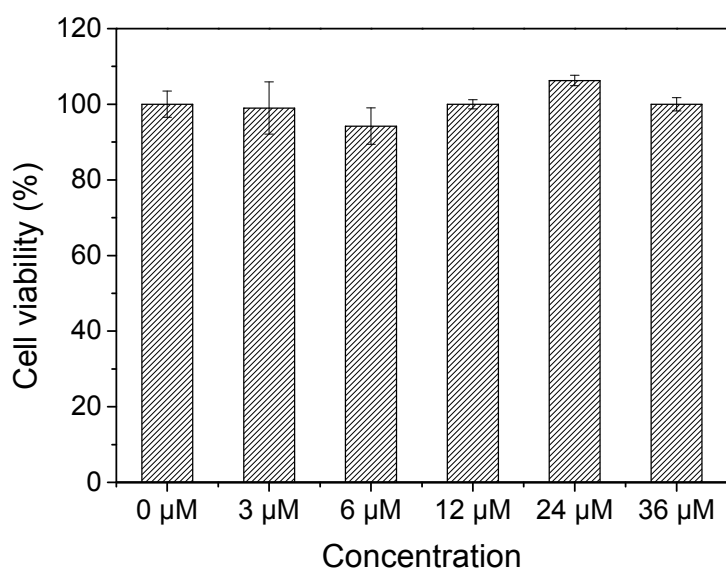

**Figure S17.** Cell viability revealed by CCK-8 assays with different concentration of **TPE-4Py/SC4A-C6/SP** based on **TPE-4Py** concentration.

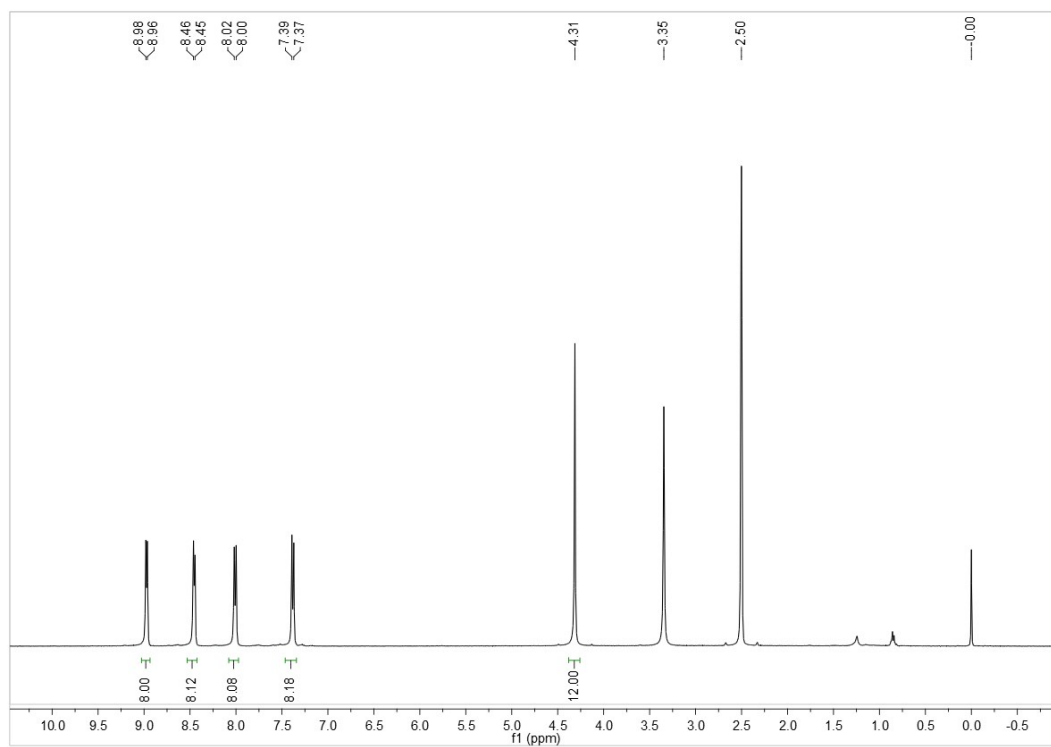

**Figure S18.**  $^1\text{H}$ -NMR spectrum of **TPE-4Py** (400 MHz,  $\text{DMSO-d}_6$ ).

Varian QFT-ESI  
File: TPE-4Py\_ESI.trans

Mode: Positive  
Scans: 1  
Date: 19-MAY-2020  
Time: 16:25:26  
Scale: 1.4145

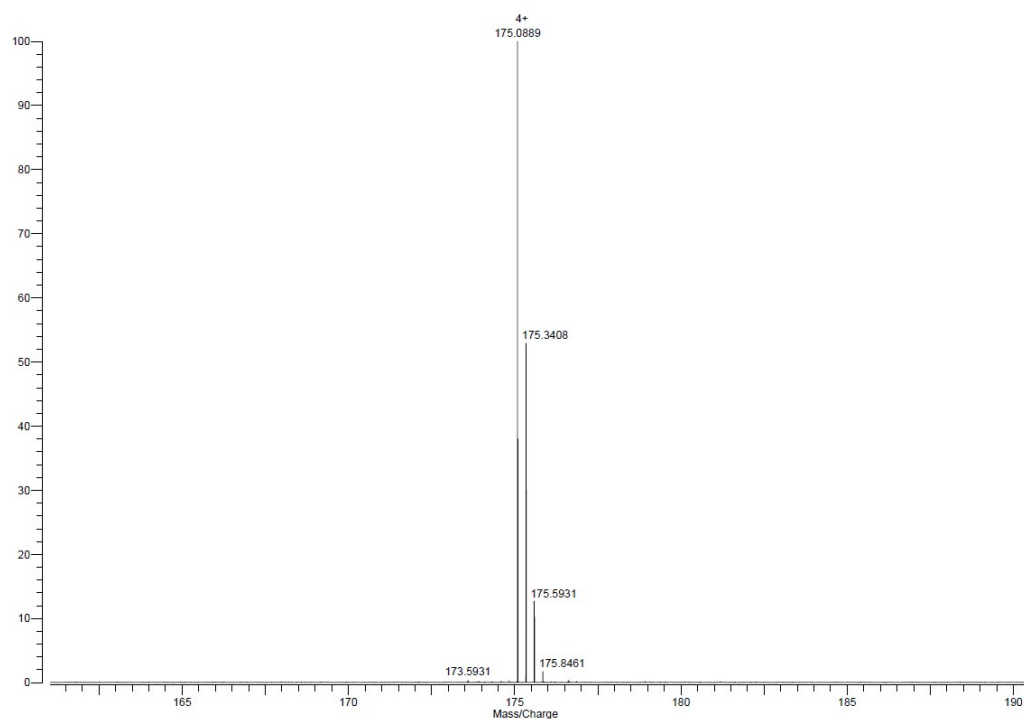

**Figure S19.** HRMS spectrum of **TPE-4Py**.

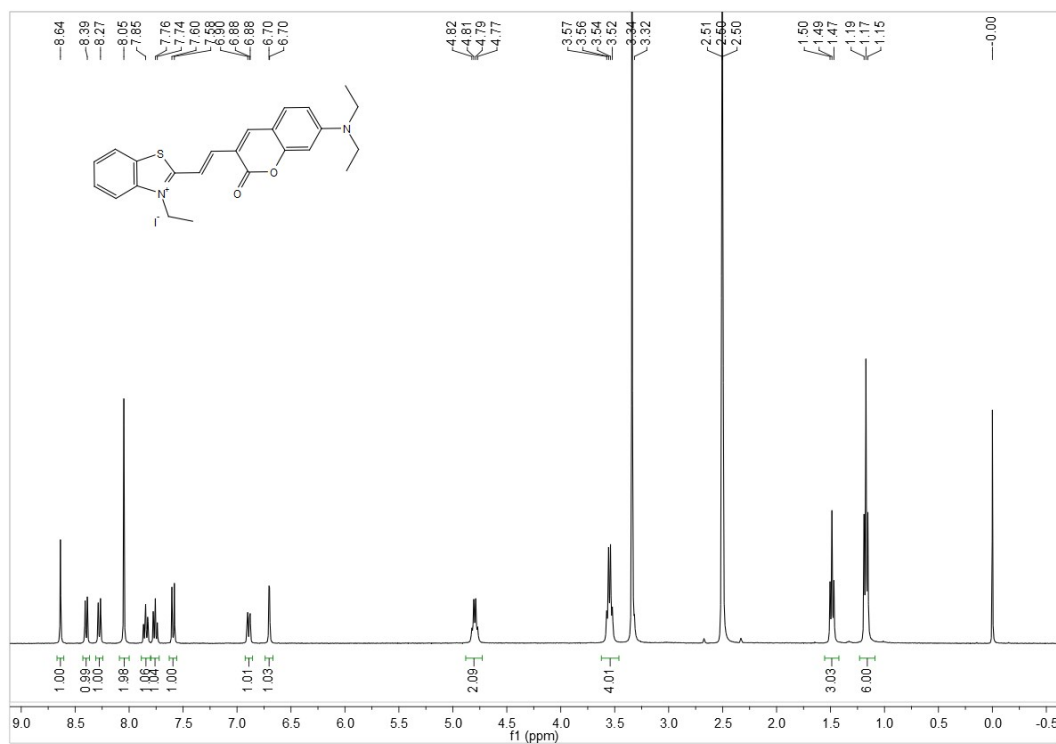

**Figure S20.** <sup>1</sup>H-NMR spectrum of **SP** (400 MHz, DMSO-*d*<sub>6</sub>).

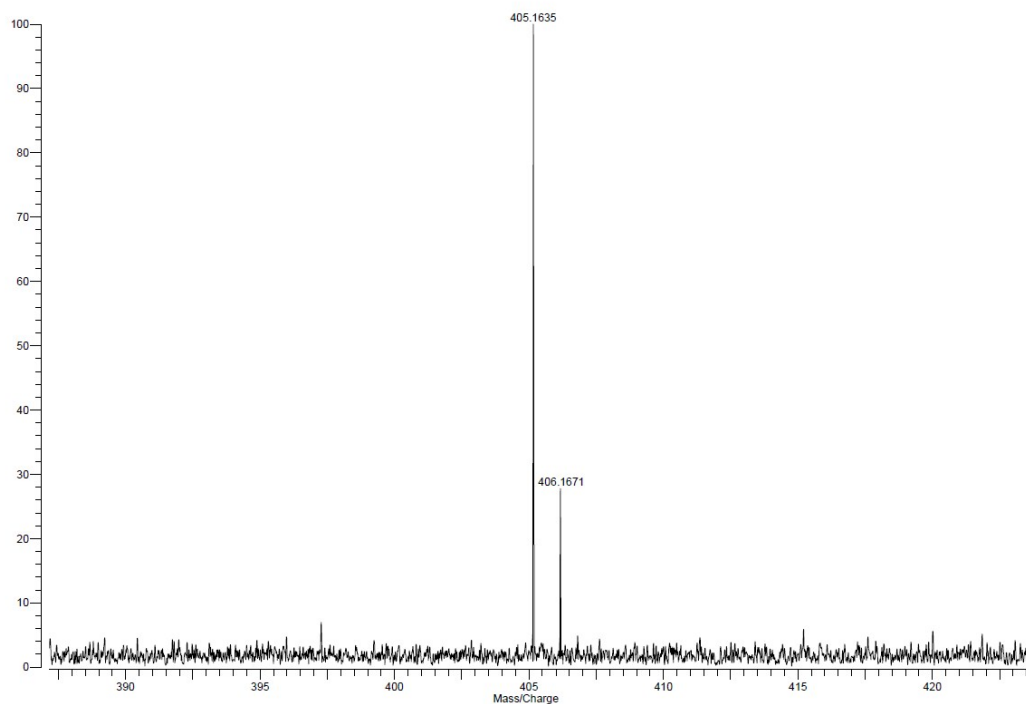

**Figure S21.** HRMS spectrum of **SP**.

## References

1. T. Zhang, Y. Li, Z. Zheng, R. Ye, Y. Zhang, R. T. K. Kwok, J. W. Y. Lam and B. Z. Tang, *J. Am. Chem. Soc.*, 2019, **141**, 5612-5616.
2. Y. Q. Sun, J. Liu, J. Zhang, T. Yang and W. Guo, *Chem. Commun.*, 2013, **49**, 2637-2639.
3. X.-Y. Hu, Y. Chen and Y. Liu, *Chin. Chem. Lett.*, 2015, **26**, 862-866.
4. S. Peng, J. Gao, Y. Liu and D. S. Guo, *Chem. Commun.*, 2015, **51**, 16557-16560.

## Author Contributions

Z. Liu and Prof. Y. Liu conceived and directed the study. X. Sun measured the fluorescence quantum yield. X. Dai performed the cytotoxicity test. J. Li performed the Zeta potential experiment. P. Li synthesized the SC4A-C6. Z. Liu wrote the main manuscript and prepared the Figures. Prof. Y. Liu supervised the work and edited the manuscript. All authors reviewed the manuscript. All authors have given approval to the final version of the manuscript.
